# Supplementary material for: Tunable light-induced topological edge states in strain engineering of bismuthene monolayers
Source: Royal Society of Chemistry journal article supplement (doi:10.1039/d4tc02438a), 2024-01-01
Supplement: d4tc02438a1.pdf [file d4tc02438a1.pdf]

## Supplemental Information for “Tunable light-induced topological edge states in strain engineering bismuthene monolayers”

Xiangru Kong,<sup>1,\*</sup> Binyuan Zhang,<sup>1</sup> Wei-jiang Gong,<sup>1</sup> and Linyang Li<sup>2,†</sup>

<sup>1</sup>College of Sciences, Northeastern University, Shenyang 110819, China

<sup>2</sup>School of Science, Hebei University of Technology, Tianjin 300401, China

- 
- [1] Yingxi Bai, Linke Cai, Ning Mao, Runhan Li, Ying Dai, Baibiao Huang, and Chengwang Niu. Doubled quantum spin hall effect with high-spin chern number in  $\alpha$ -antimonene and  $\alpha$ -bismuthene. *Phys. Rev. B*, 105:195142, May 2022.
- [2] Chengcheng Xiao, Fang Wang, Shengyuan A Yang, Yunhao Lu, Yuanping Feng, and Sheng-bai Zhang. Elemental ferroelectricity and antiferroelectricity in group-v monolayer. *Advanced Functional Materials*, 28(17):1707383, 2018.
- [3] Yiming Pan and Jian Zhou. Toggling valley-spin locking and nonlinear optical properties of single-element multiferroic monolayers via light. *Phys. Rev. Appl.*, 14:014024, Jul 2020.

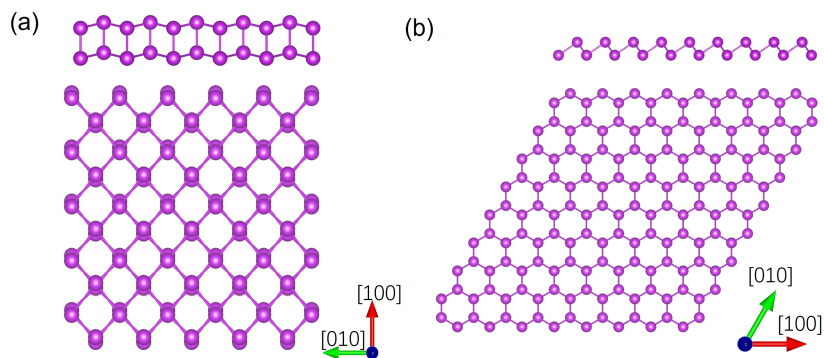

Fig. S1. The side and top views for (a) Bi(110) and (b) Bi(111) monolayers.

\* kongxiangru@mail.neu.edu.cn

† linyang.li@hebut.edu.cn

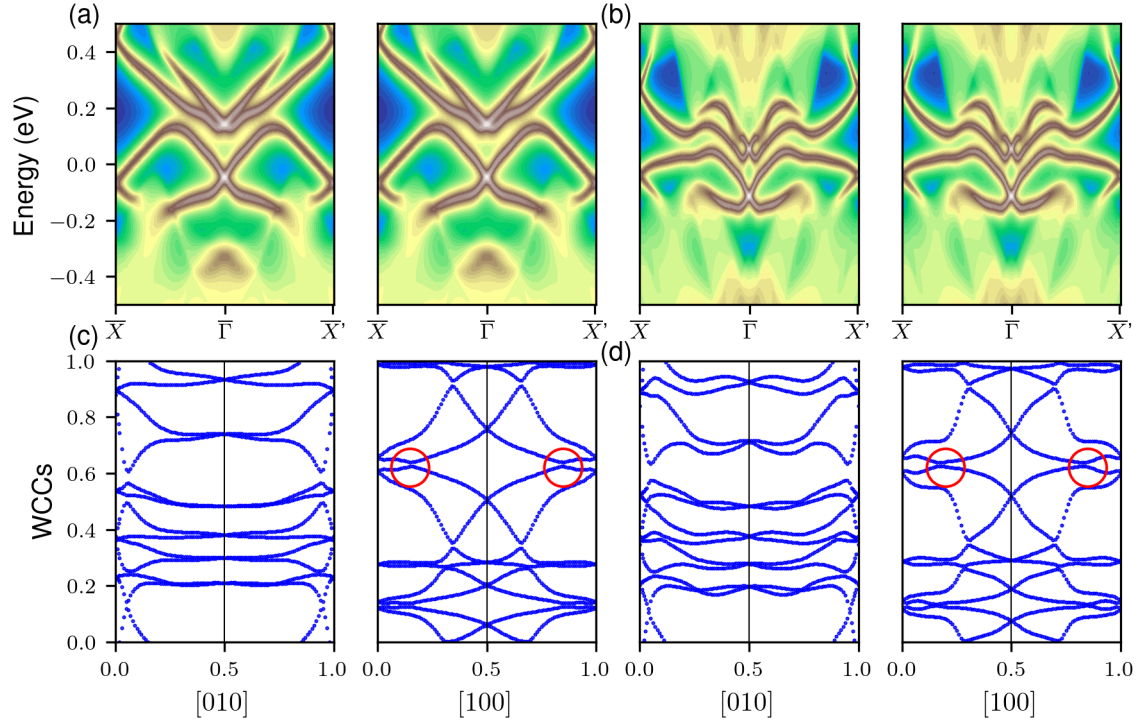

Fig. S2. Bi(100) monolayer with lattice parameters from Ref. [1], (a) the edge states along [100] direction for both edge terminations; (c) Wannier Charge Centers (WCCs) spectrums that evolve along [010] and [100] directions. For lattice parameters from Ref. [2], (b) the edge states along [100] direction for both edge terminations; (d) Wannier Charge Centers (WCCs) spectrums that evolve along [010] and [100] directions. The red circles indicate the gap in the WCC spectrums.

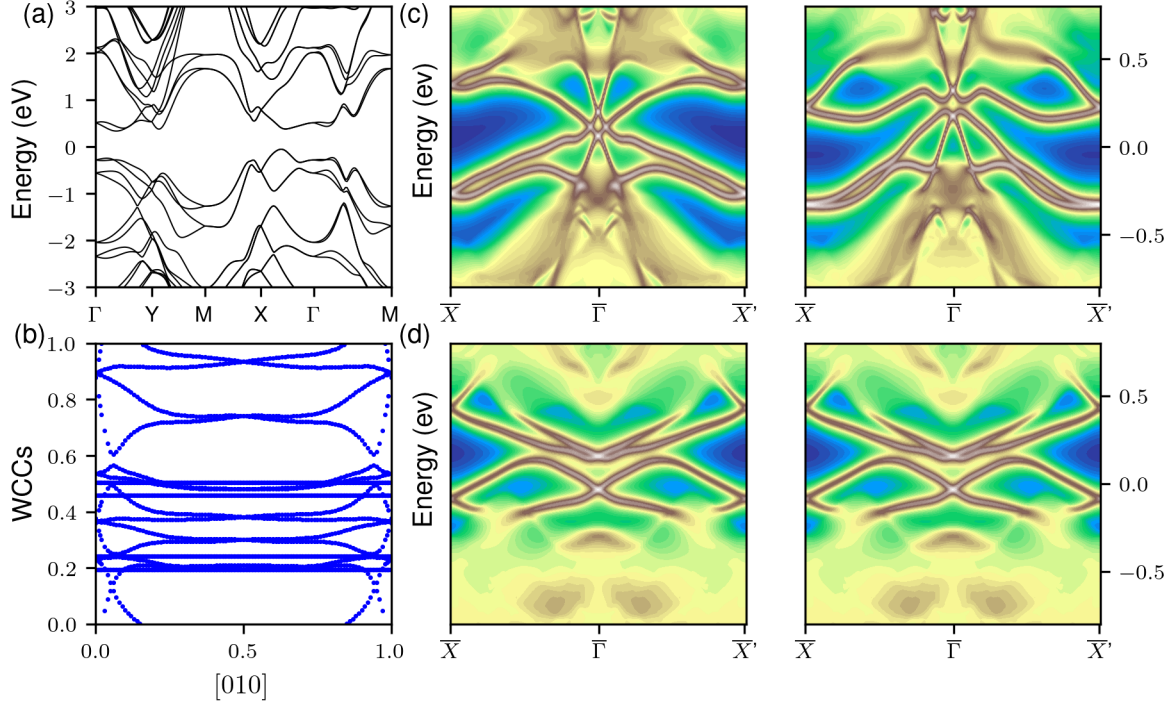

Fig. S3. Bi(110) monolayer with lattice parameters from Ref. [3], (a) the electronic band structures; (b) the WCCs spectrum along [010] direction; (c) and (d) the edge states for both right and left edges along [010] and [100] directions, respectively.

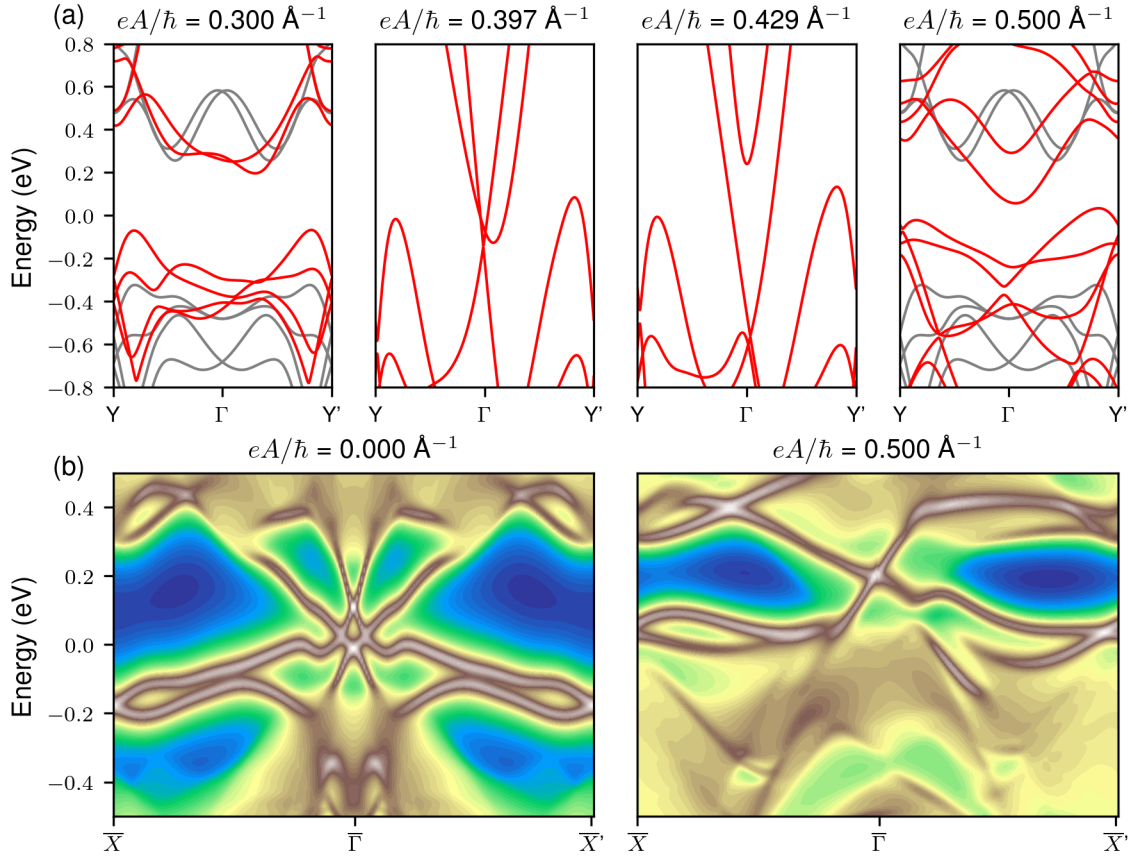

Fig. S4. Bi(110) monolayer with lattice parameters and 5% tensile strain from Ref. [3], (a) shows the Floquet band structures (red lines) with light intensity, and the gray lines in (a) indicate the undriven electronic band structures. (b) shows the double pairs of helical edge states in the undriven Bi(110) monolayer on the right edge along along [010] direction. (c) When  $eA/\hbar = 0.5\text{\AA}^{-1}$ , the light-bismuthene coupled system behaves only one pair of helical edge states along [010] direction.

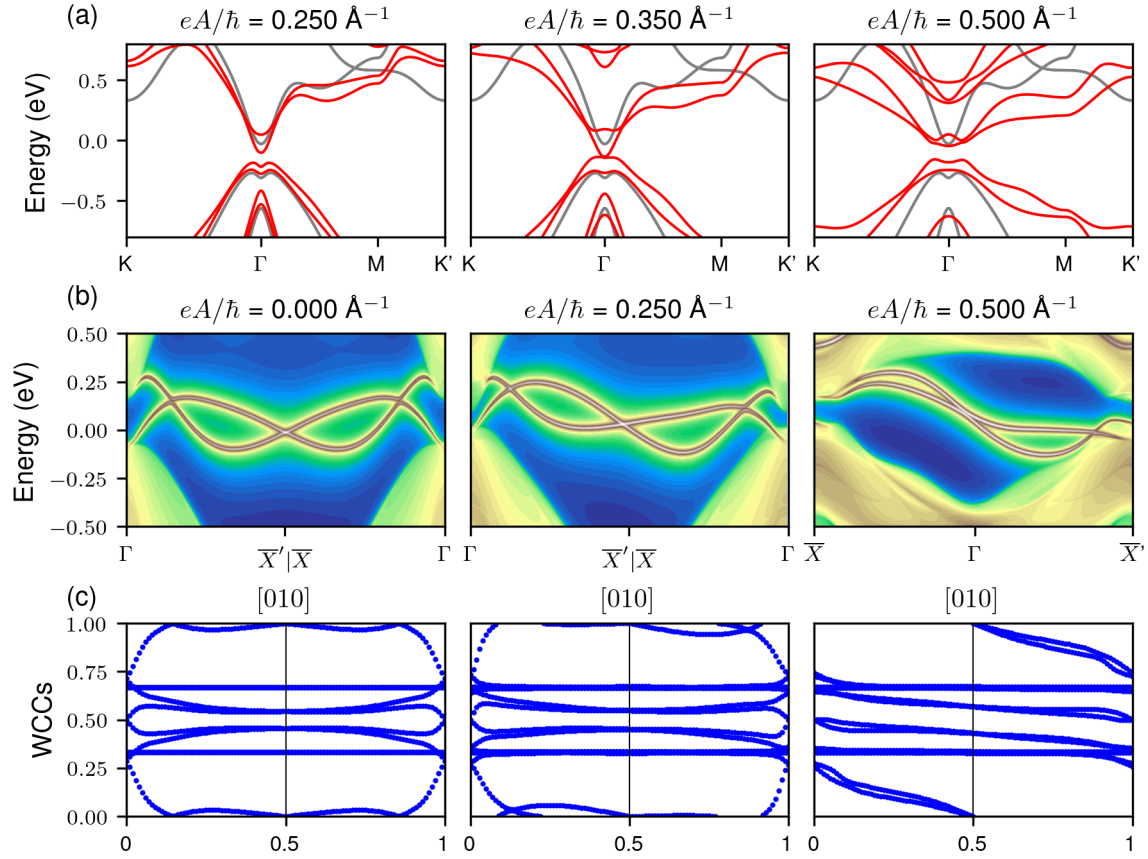

Fig. S5. With 4% tensile strain on Bi(111) monolayer, (a) shows the Floquet band structures (red lines) with light intensity  $eA/\hbar = 0.25\text{\AA}^{-1}$ ,  $0.35\text{\AA}^{-1}$  and  $0.5 \text{ \AA}^{-1}$ , respectively; the gray lines in (a) indicate the undriven electronic band structures. (b) the Floquet engineering edge states with light intensity  $eA/\hbar = 0\text{\AA}^{-1}$ ,  $0.25\text{\AA}^{-1}$  and  $0.5 \text{ \AA}^{-1}$  along [010] direction. (c) the corresponding WCCs spectrum with light intensity  $eA/\hbar = 0\text{\AA}^{-1}$ ,  $0.25\text{\AA}^{-1}$  and  $0.5 \text{ \AA}^{-1}$  along [010] direction.

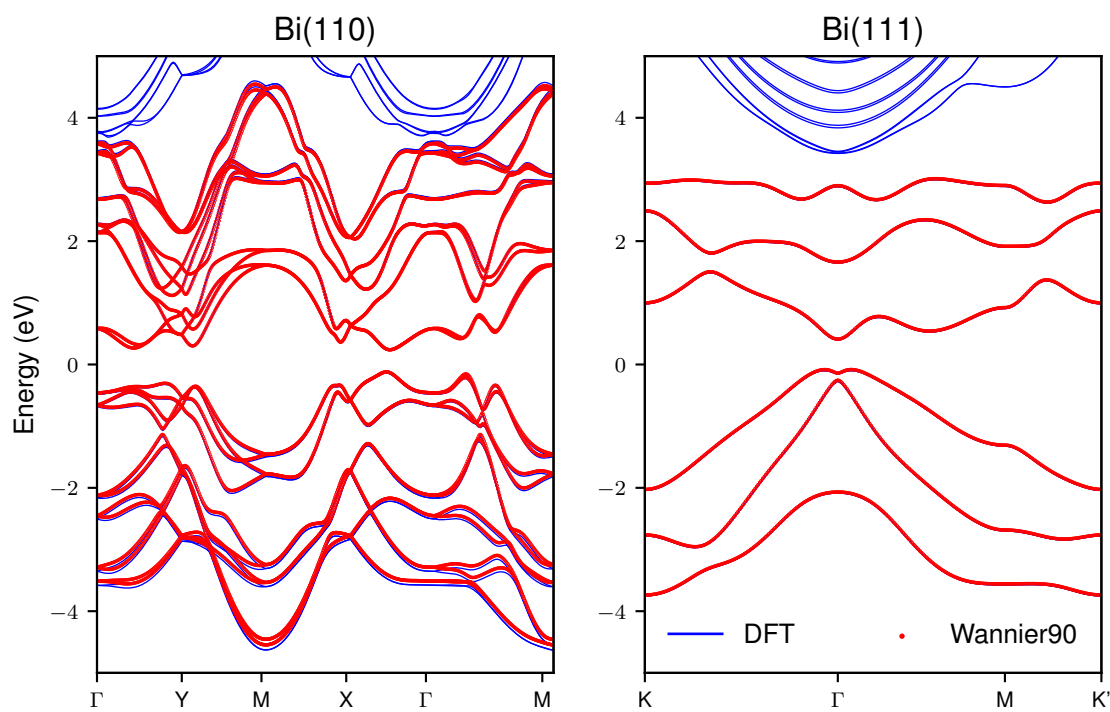

Fig. S6. The comparison between band structures from DFT calculations and Wannier functions indicates the projections of p orbitals in Bi atoms could fully describe the Bi(110) and Bi(111) monolayers.

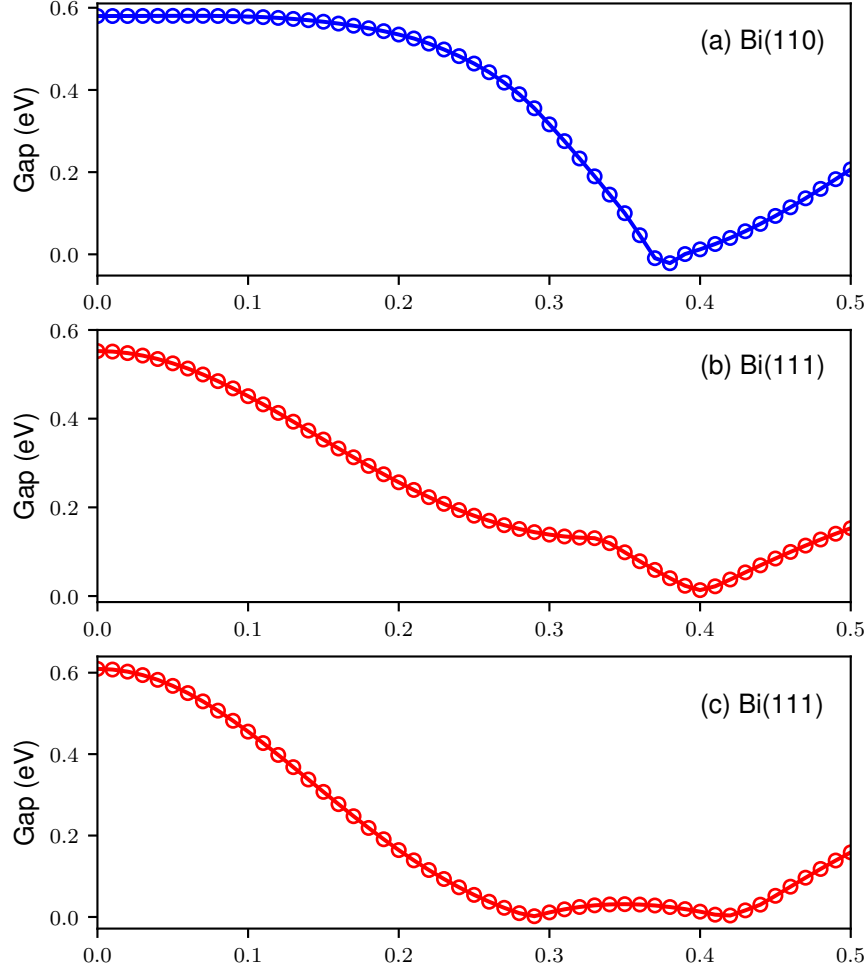

Fig. S7. The light-induced band gaps in (a) Bi (110) monolayer with lattice parameters from Ref. [3]; (b) Bi(111) monolayer with fully relaxed lattice parameters ( $a = 4.33\text{\AA}$ ) and (c) Bi(111) monolayer with 4% compressive strain. Due to the topological phase transitions relates with the opening and closing of local band gaps, so we define the light-induced band gaps in Bi(111) monolayer as the local gap around  $\Gamma$  point.
